# Supplementary material for: HIF-1α-mediated LAMC1 overexpression is an unfavorable predictor of prognosis for glioma patients: evidence from pan-cancer analysis and validation experiments
Source: Springer Nature journal article supplement (doi:10.1186/s12967-024-05218-3), 2024-04-27
Supplement: MOESM1 [file 12967_2024_5218_MOESM1_ESM-1.pdf]

Additional file 1

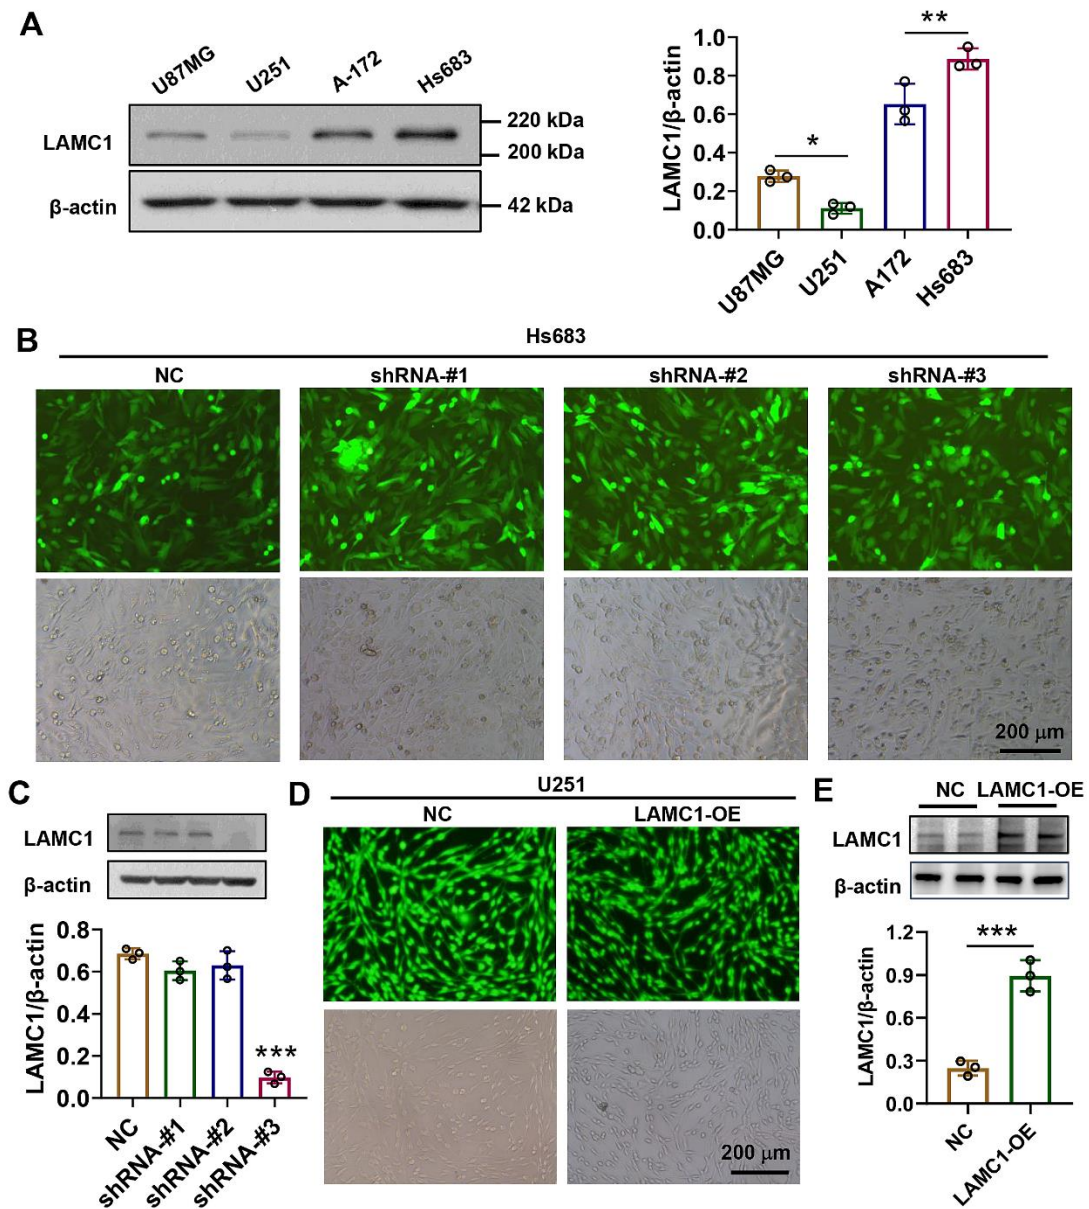

**Figure S1. Screening and targeted intervention of glioma cell lines with differential expression of LAMC1.** (A) LAMC1 protein expression in glioma cell lines detected by western blotting.  $*P < 0.05$ ,  $**P < 0.01$ . (B) Observation of the lentivirus infection effects in Hs683 cells under microscopes. (C) Western blot was used to detect the inhibitory effects of different RNAi targets on LAMC1 expression,  $***P < 0.001$  vs NC. (D) Observation of the lentivirus infection effects in U251 cells under microscopes. (E) Western blot was used to detect the LAMC1 expression in U251 cell line post viral infection,  $***P < 0.001$ .

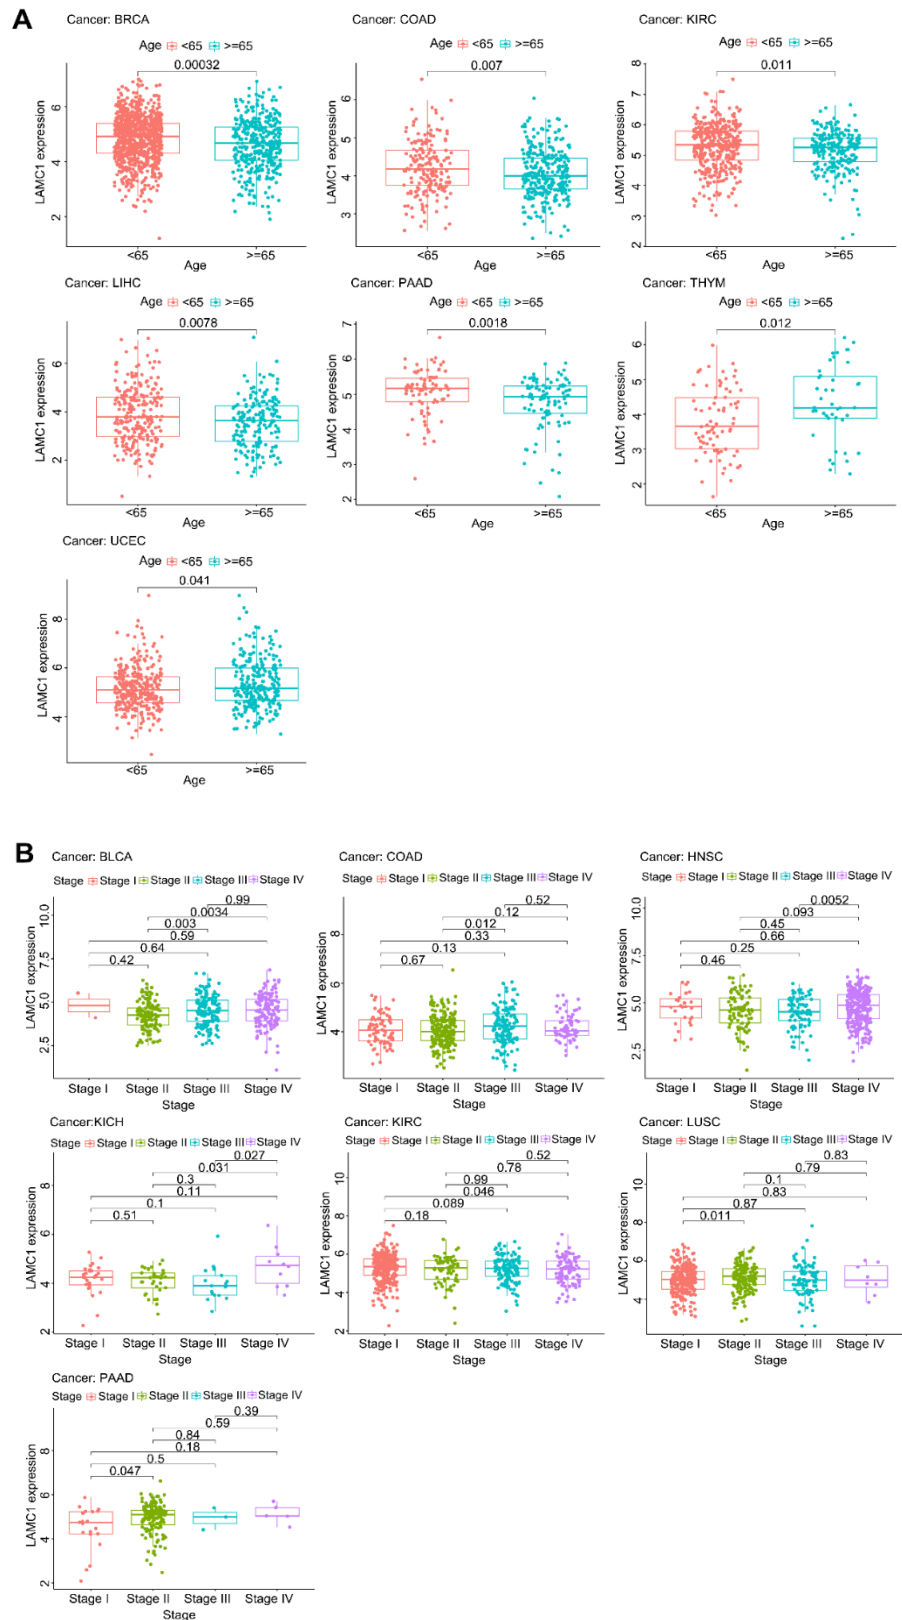

**Figure S2. Correlation analysis of *LAMC1* expression and clinicopathological features. (A) Age. (B) Stage.**

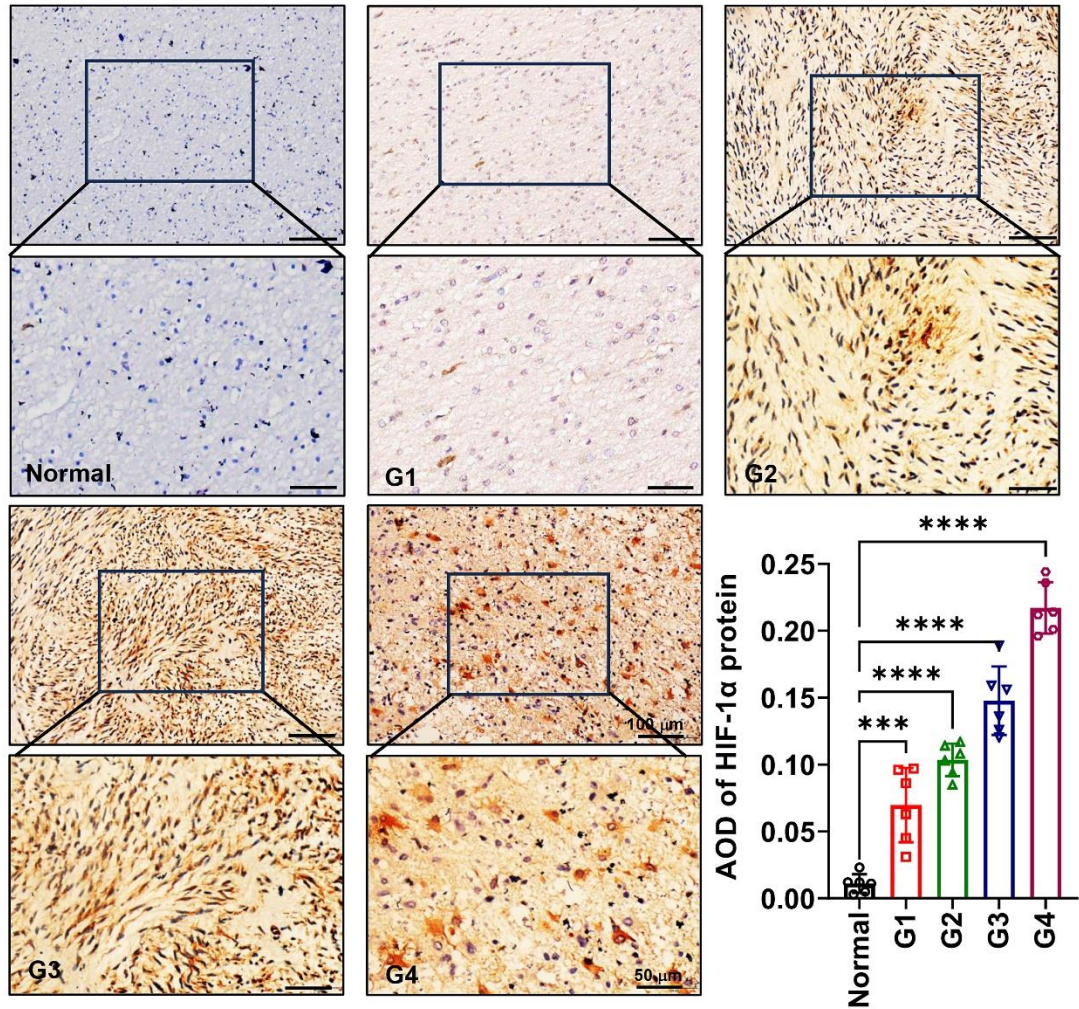

**Figure S3. Immunohistochemical detection of HIF-1 $\alpha$  protein expression in clinical gliomas and control tissues.** Total 15 sections of clinical samples (normal, n=3; glioma G1, n=3; glioma G2, n=3; glioma G3, n=3 and glioma G4, n=3) from Shanghai Outdo Biotech were used for immunohistochemical staining of HIF-1 $\alpha$ . Mouse anti human HIF-1 $\alpha$  antibody (Cat: #PTM-5851, PTMBIO, Hangzhou, China) and PV-8000 staining kit (ZSGF-BIO, Beijing) were used. The positive expression signal of HIF-1 $\alpha$  protein is located in the nucleus and cytoplasm. Expression levels of HIF-1 $\alpha$  was quantified using the average optical density (AOD) values, and each section adopts 2 typical views. Bars = 100  $\mu$ m or 50  $\mu$ m. \*\*\* $P$ <0.01, \*\*\*\* $P$ <0.0001.

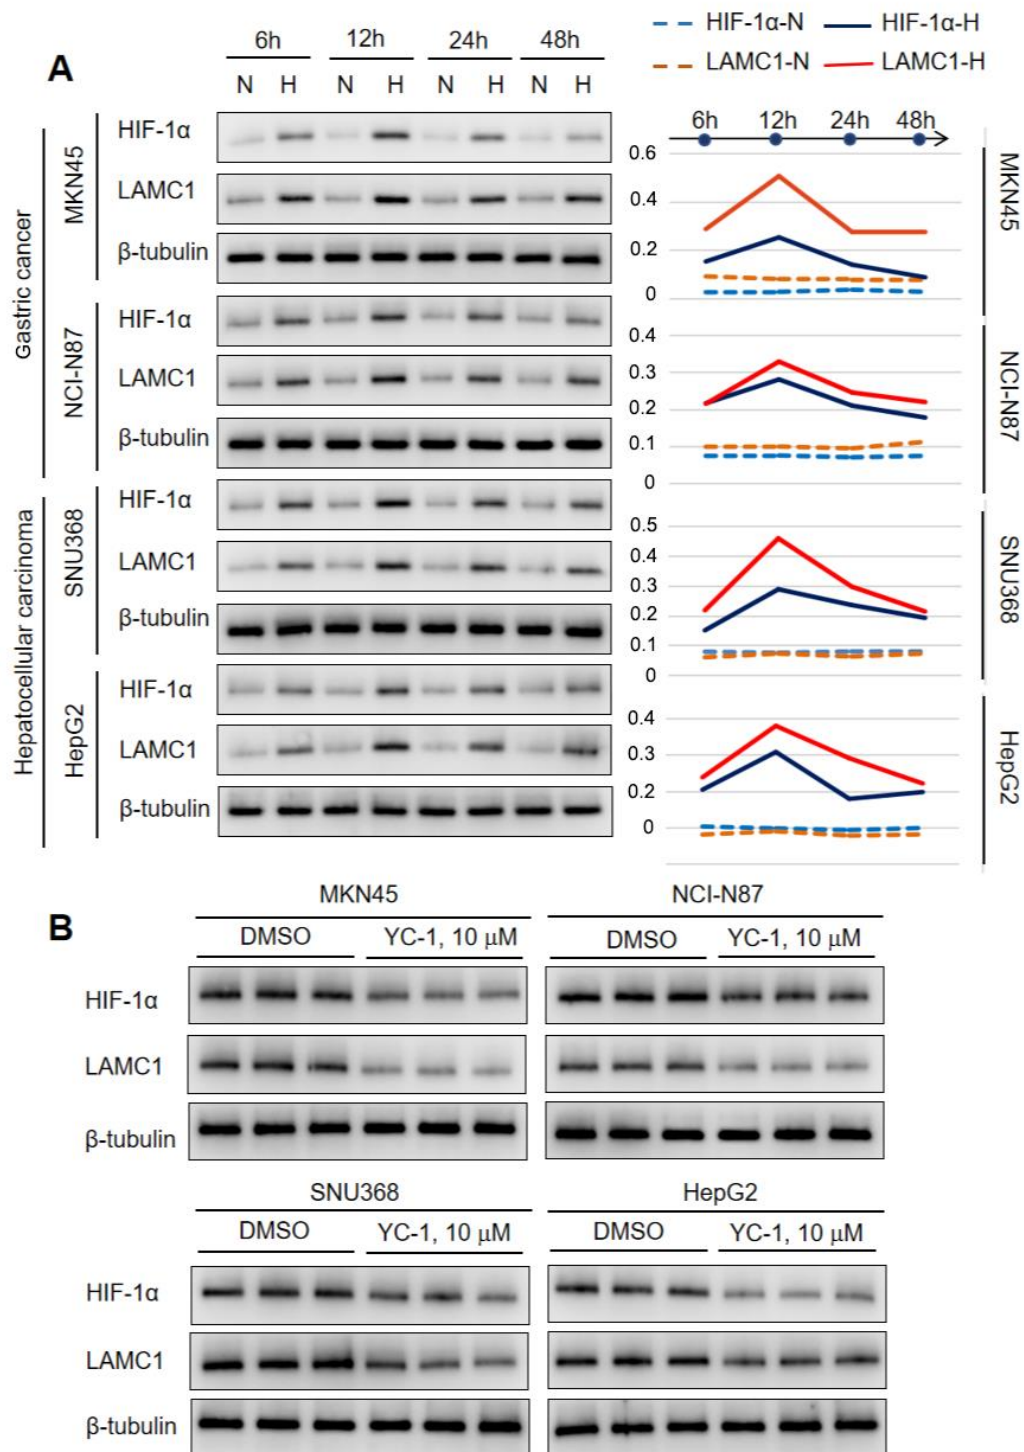

**Figure S4. Expression and regulation of HIF-1 $\alpha$  and LAMC1 in gastric cancer and liver cancer cells.** (A) LAMC1 and HIF-1 $\alpha$  protein expression in gastric and liver cancer cells under normoxia (N) and hypoxia (H) conditions. (B) HIF-1 $\alpha$  inhibitor YC-1 inhibited LAMC1 and HIF-1 $\alpha$  protein expression in gastric and liver cancer cells after 12 h of hypoxia.

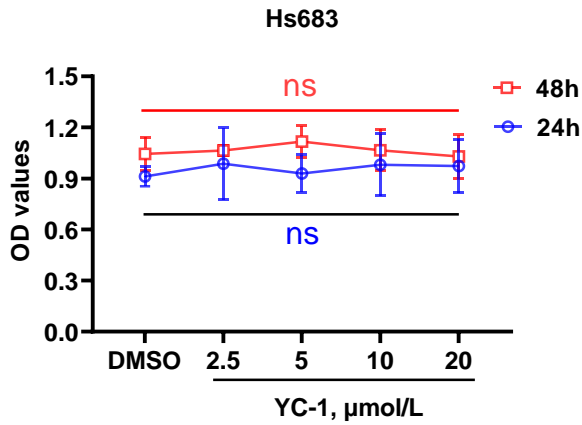

Figure S5. The effect of different concentrations of YC-1 on the viability of Hs683 cells detected by CCK-8 assay. Ns, none significance.

Table S1.

The relation of LAMC1 expression to the clinicopathological features in glioma.

| Items                    |           | High LAMC1 expression(n=120) | Low LAMC1 expression(n=30) | $\chi^2$ | P-value |
|--------------------------|-----------|------------------------------|----------------------------|----------|---------|
| Gender                   | female    | 43                           | 10                         | 0.066    | 0.798   |
|                          | male      | 77                           | 20                         |          |         |
| Age(years)               | $\leq 39$ | 44                           | 14                         | 1.012    | 0.314   |
|                          | $> 39$    | 76                           | 16                         |          |         |
| Grade                    | I-II      | 68                           | 24                         | 5.510    | 0.019   |
|                          | III-IV    | 52                           | 6                          |          |         |
| Postoperative recurrence | No        | 46                           | 21                         | 9.737    | 0.002   |
|                          | Yes       | 74                           | 9                          |          |         |

Table S2.

Univariate and multivariate analysis of the relationship between LAMC1 expression and overall survival in glioma patients.

| Risk factor                   | Univariate analysis |              |         | Multivariate analysis |              |         |
|-------------------------------|---------------------|--------------|---------|-----------------------|--------------|---------|
|                               | HR                  | 95% CI       | P-value | HR                    | 95% CI       | P-value |
| Gender(M/F)                   | 1.559               | 0.859-2.828  | 0.144   | 1.905                 | 1.024-3.545  | 0.042   |
| Age( $> 39/ \leq 39$ , years) | 3.907               | 1.908-8.000  | 0.000   | 3.964                 | 1.890-8.314  | 0.000   |
| Grade (I-II/III-IV)           | 17.821              | 8.327-38.139 | 0.000   | 18.057                | 8.240-39.573 | 0.000   |
| Recurrence (Yes/No)           | 1.460               | 0.841-2.537  | 0.179   | 1.020                 | 0.570-1.824  | 0.947   |
| LAMC1(High/Low)               | 2.292               | 0.980-5.356  | 0.056   | 1.138                 | 0.477-2.713  | 0.770   |

HR: hazard ratio, CI: confidence interval
